# Supplementary material for: Recovery of the first ever multi-year lidar dataset of thestratospheric aerosol layer, from Lexington, MA, and Fairbanks,AK, January 1964 to July 1965
Source: Copernicus journal article supplement (doi:10.5194/essd-2020-246), 2020-11-03
Supplement: Supplementary file [file essd-2020-246-AC1-supplement.pdf]

## **Interactive comment on “Recovery of the first ever multi-year lidar dataset of the stratospheric aerosol layer, from Lexington, MA, and Fairbanks, AK, January 1964 to July 1965” by**

**Juan-Carlos Antuña-Marrero et al.**

### **Replies to Reviewers Comments:**

We thank the reviewers for the comments and suggestions they made, contributing to the improvement of the manuscript.

### **Introductory statement by the authors:**

The SSIRC data rescue activity has a philosophy to involve modeling scientists as well as observational scientists, both to improve communication between the often separated communities, and also to help identify priority measurement datasets and aerosol metrics that can be of most benefit to the modelling community. Reviewer 1 has requested to remove the comparisons to model predictions dataset in section 3.4 of the manuscript, but we feel strongly this is an important element of the manuscript, highlighting why the observations dataset is of such importance both to current international climate modelling activities such as CMIP6 (Eyring et al., 2016; Zanchettin et al., 2016) and to stratospheric aerosol modelling activities such as ISA-MIP (Timmreck et al. 2018). We feel that applying strict rules to separate the publication of observational datasets and modelling datasets would in this case be in conflict also with the spirit of the ESSD journal to promote international interdisciplinary research.

### **Anonymous Referee #1**

Received and published: 14 January 2021

### **1 Major Comments**

The authors report on the reanalysis of historic first lidar measurements of stratospheric aerosol in the 1960s. Rescuing such old datasets, and re-evaluating them is a very worthwhile undertaking, well suited for ESSD. Unfortunately, I find this is a very wordy and lengthy manuscript, which confuses me with lots of unnecessary or even irrelevant information. Generally the manuscript would benefit much from focusing, substantial shortening (by 30% or more), and also from English editing. I provide a few example lines / sentences below, but nearly all sections could take much more shortening, e.g. the lengthy introduction about model simulations of stratospheric aerosol, which are motivation, but in detail not relevant here.

### **Reply:**

Although it would have been possible for us to have written this manuscript solely to describe the recovery and processing of the lidar observational datasets, we chose to design the paper also to seek to understand the variations seen in the measurements, via comparison to interactive stratospheric aerosol model simulations of the Agung aerosol cloud (Dhomse et al., 2020). These model simulations were carried out following exactly the protocol for the co-ordinated “HERSEA Agung” experiment within the international modelling initiative ISA-MIP (Timmreck et al., 2018). The inclusion also of comparisons with the volcanic forcing datasets for the CMIP5 and CMIP6 climate modeling initiatives means this section 3.4 provides valuable additional context for the recovery methodology, aligning with both of these two international community modelling activities.

Although we agree certainly a description of the model would be outside the scope of this paper, since we see section 3.4 as an important part of the paper, we choose to retain the rationale we have included in the Introduction, to explain to readers why these new measurements are of wider significance to the modelling community. For example to alert the reader to be aware of the large change in the stratospheric aerosol optical properties (and hence surface cooling) that climate model enact for the Agung cloud within CMIP6 historical integrations, compared to that enacted for CMIP5 (see Niemeier et al., 2019).

We have improved the wording in the sentences in the Abstract to make clearer the relevance of the re-calibration to account for the two-way transmittance effect, and the initial model comparison that suggests the 1965 variations in the recovered measurements are not from the Agung aerosol cloud.

We have revised lines 25 to 33 in the Abstract, to improve the communication of these aspects, the wording in the revised manuscript reading:

**Lines 25-28 re-worded to:**

*“We show that accounting for these two-way transmittance effects substantially increases the magnitude of the 1964/5 stratospheric aerosol layer’s optical thickness in the Northern Hemisphere mid-latitudes, then ~50% larger than represented in the CMIP6 volcanic forcing dataset. Compared to the uncorrected dataset, the combined transmittance correction increases  $sAOD_{532}$  by up to 66% for Lexington, and up to 26% for Fairbanks, individual sAEP adjustments of similar magnitude.”*

**Lines 30-31 re-worded to:**

*“Within the January 1964 to August 1965 measurement timespan, the corrected Lexington  $sAOD_{532}$  timeseries is substantially above 0.05 in three distinct periods: October 1964, March 1965 and May-June 1965, whereas the 6 nights the lidar measured in December 1964 and January 1965 had  $sAOD_{532}$  at most ~0.03.”*

**Lines 31-33 re-worded to:**

*“Comparing to interactive stratospheric aerosol model simulations of the Agung aerosol cloud shows that, although substantial variation in mid-latitude  $sAOD_{532}$  are expected from the seasonal cycle in the stratospheric circulation, the Agung cloud’s dispersion from the tropics would have been at its strongest in winter, and weakest in summer. The increasing trend in  $sAOD$  from January to July 1965, also considering the large variability, suggests that the observed variations are from a different source than Agung, possibly from one or both of the two VEI3 eruptions....”*

The complicated derivation of  $\alpha_a(532, z)$  in section 2.4 does not make sense to me. **G-66** list  $SRo(694, z)$ , but without correction for the 2-way transmission  $T_{2w}^2$  due to Rayleigh-extinction, ozone absorption, and aerosol extinction. The way I read it, the authors then derive  $\beta_a(694, z)$  from  $SRo(694, z)$  (their Eq. 6), again without correction for the 2-way transmissions. This step requires atmospheric density profiles, and Rayleigh backscattering cross-sections (their Eqs. 3 to 5). They then correct  $\beta_a(694, z)$  for the 2-way transmissions due to molecular Rayleigh-extinction and ozone absorption, but not for the 2 way transmission due to aerosol scattering, and go on to derive  $\beta_a(532, z)$  (their Eq. 7, using wavelength dependence from Jäger and Deshler, 2002, 2003, both missing in the references, see also Jäger et al., GRL, 2005, <https://doi.org/10.1029/95GL01521>). Then  $\beta_a(532, z)$  is converted to  $\alpha_a(532, z)$  (using Jäger and Deshler 2002, 2003), and  $\alpha_a(532, z)$  is corrected for two-way aerosol transmission (Eqs. 9 and 10). At the end of this process,  $\alpha_a(532, z)$  is not consistent with  $\beta_a(532, z)$ , because the derived  $\alpha_a(532, z)$  was not fed back into the derivation of  $\beta_a(532, z)$ . Results at 532 nm are also very far from the original measurement,  $SRo(694, z)$ , or  $\beta_a(532, z)$  at 694 nm.

**Reply:** The references of Jäger and Deshler, 2002, 2003, have been added.

In my opinion, it would be much more logical (and more accurate) to iteratively derive a consistent pair  $\beta_a(532, z)$  and  $\alpha_a(532, z)$  from the tabulated  $SRo(694, z)$  of **G-66**. The initial step would neglect aerosol extinction  $\alpha_a(694, z) = 0$ , and derive  $\beta_a(694, z)$  (similar to Eqs. 2 to 6), but with appropriate corrections for the 2-way transmissions due to Rayleigh-extinction and ozone absorption (similar to Eq. 7). It is important, and should be mentioned, that at 694 nm and over the altitude range from 12 to 25 km considered here, these 2-way transmissions corrections are small, each less than 2%, because ozone absorption and Rayleigh extinction are very small at 694 nm in the stratosphere. The combined 2-way Rayleigh and ozone transmission at 694 nm through the stratosphere is about 0.97, very close to 1. In the next iterations,  $\alpha_a(694, z) = EB(z)$   $\beta_a(694, z)$  is assumed, and the

calculation steps are repeated, including the estimated 2-way aerosol transmission (from  $\alpha_a(694, z)$ ), and provide a new estimate for  $\beta_a(694, z)$ . Compared to the combined 2-way Rayleigh and ozone transmission ( $\approx 0.97$ ), the 2-way aerosol transmission is smaller ( $\exp(-2.04) \approx 0.92$  according to Fig. 9), so accounting for it is more important. The iterations are repeated, and usually converge after 3 to 5 steps. At the end they provide a consistent pair  $\beta_a(694, z)$  and  $\alpha_a(694, z)$ . Note that this is not the case in the current approach of the authors, because the derived  $\alpha_a(532, z)$  cannot be fed back into the calculation of  $\beta_a(694, z)$ . If  $\alpha_a(532, z)$  is desired, it can be estimated from  $\alpha_a(694, z)$  in a final step (using Jäger and Deshler 2002, 2003).

I think the authors need to explain / justify why their approach is valid, and why the approach suggested above was not taken.

**Reply:** There are several approaches to process stratospheric aerosol lidar signals. The reviewer suggest one of them.

The principal effect produced by stratospheric aerosols from volcanic eruptions is the scattering of solar radiation, causing the radiative forcing of the atmosphere-earth system. Global aerosol models tend to diagnose mid-visible aerosol optical properties at either 550nm or 532nm, and we choose the latter as the standard wavelength to report the derived aerosol extinction, to align with that from modern Nd:YAG lidars.

We calculate the two-way aerosols transmittance using the total AOD from surface observations (which includes tropospheric and stratospheric AOD) but produce no profile of the two way transmittance and apply the two-way transmittance aerosol correction to derive a first guess of  $\alpha_a(532, z)$ . In the next step we calculate the tropospheric AOD by subtracting the stratospheric AOD from the Total AOD and producing a profile of AOD between 12 and 24 km, which is used to derive a two way transmittance profile between 12 and 24 km that will be applied again to the uncorrected  $\alpha_a(532, z)$  to produce the two way transmittance corrected stratospheric aerosols profile  $\alpha_a^{Ta}(532, z)$ . Still and iteration of those final steps is possible, but the high magnitude of the estimated  $\alpha_a^{Ta}(532, z)$  mean error, around 60%, compared to a estimated 15-20% maximum improvement achieved by the iteration procedure, makes it nonsense.

Because all the equations involved in the processing Eq. (6) to (10) consist of products and divisions, for the goal to calculate  $\alpha_a^{Ta}(532, z)$  the correction by the two way transmittance may be applied directly in the calculation of  $\alpha_a^{Ta}(532, z)$ , not been necessary to fed back  $\alpha_a(532, z)$  to calculate  $\beta_a(532, z)$ .

For our purposes  $\alpha_a(694, z)$  has no interest at all. Moreover, because our only interest is  $\alpha_a(532, z)$ . We do not have any interest also to fed back  $\alpha_a(532, z)$  into the calculation of  $\beta_a(694, z)$  or  $\beta_a(532, z)$ . However any researcher interested in that variable may calculate himself using the rescued SR dataset and the available variables, all stored in PANGAEA.

Given this problem, as well as the very lengthy and cumbersome text, I feel that the paper needs major revisions. In doing these, the authors should remember that conciseness is very important for any scientific paper. Most readers will be familiar with the basics, and only need to be informed about important and new results. There is no need to start from Adam and Eve, which tends to be the case here.

## 2 More Specific Comments

Abstract: Somewhere, it should be mentioned that the primary quantity measured by a stratospheric lidar (and also produced in the dataset) is the backscatter ratio or the aerosol backscattering coefficient, not the extinction coefficient. Extinction is a derived / secondary quantity. It relies much more on assumptions (about the extinction to backscatter ratio, also called lidar ratio) than backscatter. Extinction is usually small, but is necessary to derive the best possible backscatter profile.

**Reply:** We do not agree with the reviewer. The information he suggest to include in the abstract is very basic lidar information. The sentence “Extinction is usually small, but is necessary to derive the best possible backscatter profile.” Does not apply in cases of the major volcanic eruptions, which is the case we present.

line 56: something missing / incomplete sentence?

**Reply:** The reviewer is referring to this sentence:

*“The main motivation for this HErSEA multi-model experiment (Historical Eruption SO<sub>2</sub> Emission Assessment) is to gather stratospheric aerosol observations to evaluate the model simulations, and understand the current diversity in the sulphur emission amount and altitude distribution interactive stratospheric aerosol models use when simulating the Pinatubo aerosol cloud (see section 3.3.2 of Timmreck et al., 2008).”*

We do not consider that sentence to be missing something or to be incomplete. There was a typo re: the citation of the Timmreck et al. paper being published in 2018 not in 2008, and we have corrected that in the revised manuscript. The word “evaluate” could perhaps have been improved to change “observations to evaluate the” instead to “observations to provide new constraints to evaluate the”, and we have made that change also in the revised manuscript. On reflection, we see that also adding “in the periods after major tropical eruptions” is then clearer which periods are the priority within the historical record.

We have therefore re-worded that sentence into two sentences, also being clear that both aspects mentioned are motivations within the activity. The revised text reads as follows:

*“One of the main motivations within this HErSEA multi-model experiment (Historical Eruption SO<sub>2</sub> Emission Assessment) is to gather stratospheric aerosol observations in the periods after major tropical eruptions to provide new constraints to evaluate the model simulations. Another is to seek to understand whether the current diversity in the sulfur emission amount and altitude distribution that stratospheric aerosol models use when simulating the Pinatubo aerosol cloud is also seen for Agung (see section 3.3.2 of Timmreck et al., 2018).”*

line 77/78: something missing / incomplete sentence?

**Reply:** The sentence:

*“Although the descent in the peak of the backscatter ratio profile from Lexington is analysed within GF-67, only limited estimates of the cloud’s aerosol extinction exist ( $2 \times 10^{-3} \text{ km}^{-1}$  at 16 km and the aerosol optical depth of 0.015 (Deirmejian, 1971) were produced.”*

Has been changed:

*“Only a few quantitative estimates of the cloud’s optical properties from the lidar dataset have been found; aerosol extinction of  $2 \times 10^{-3} \text{ km}^{-1}$  at 16 km and the aerosol optical depth of 0.015 (Deirmejian, 1971).”*

line 106/107: replace "very high frequency" by "short pulse". The text says "nanosecond", but Table 1 says < 1µsec. What is correct? I would assume micro-second, because in the 1960s nano-seconds were very hard to achieve, and even harder to measure.

**Reply:** Corrected to “short pulse”. It is microseconds also corrected.

line 107 to 110: Both sentences could easily be deleted.

**Reply:** We prefer to keep both sentences, to honor and publicize the broad and extensive pioneering work conducted by Dr. Giorgio Fiocco and his colleagues.

line 111: after "detected", add "between 10 and 30 km altitude"

**Reply:** Corrected.

line 150: add "in the stratosphere" after  $T_{2w}^2$

**Reply:** Corrected.

line 155: Add "This is a good assumption for times of low stratospheric aerosol loading. For enhanced stratospheric aerosol, e.g. after volcanic eruptions, however, aerosol extinction becomes important, reduces the stratospheric transmission, and makes it range dependent."

**Reply:** Added

lines 159 to 161: This could be said much shorter and better. Just say "In a final step, each profile was normalized to one between 25 and 30 km."

lines 162 to 166: Again, very wordy and lengthy. Should be shortened.

**Reply:** Regarding the above 2 comments, we rewrote the sentences from line 159 to 166:

*"A final step consisted in normalizing the ratios calculated in each profile between 12 and 24 km. To that end, for each profile the average value between 25 and 30 km of the ratios calculated in the former step were determined. Then for each profile the ratios in the altitude range 12 and 24 km were divided by the average value of the ratios between 25 and 30 km from the same profile. The resulting values were considered to be the backscattering ratio ( $SR_o(\lambda, z)$ ): the ratio between the total (aerosols + molecules) backscattering divided by the molecular backscattering. The normalization procedure assigned the backscattering ratio to be equal to one above 25 km, after assuming the contribution from aerosols was negligible compared to the molecular at those levels."*

The corrected sentences are:

*A final step for each profile consisted in normalizing the ratios calculated in each profile between 12 and 24 km. The, with the average ratios between 25 and 30 km for each profile were calculated. Following the ratios between 12 and 24 km in each profile were divided by the respective average value ratio between 25 and 30 km, producing the derived  $SR(694, z)$  under the assumptions already cited. The normalization procedure assumed the contribution from aerosols was negligible compared to the molecular at the normalization levels. This assumption would lead above 24 km, leading to an under-estimate of stratospheric aerosol since there would have been aerosol at these altitudes (Russell, et al., 1979)..*

lines 180 to 230: lengthy and very confusing!! People unfamiliar with stratospheric aerosol lidar will be totally confused. People familiar don't need this part, but will be puzzled now. What was done? From **G-66** and Eq. 1 you can get the lidar return signal  $\frac{dn(z)}{dt}$ . From that you can go through the process.

**Reply:** We do not agree with the reviewer. In the first paragraph of section 2.4 we explain the motivation of this section. It is a step by step explanation. The reviewer is confused: what is available are the tabulated values of  $SR_o(\lambda, z)$ , not  $\frac{dn(z)}{dt}$ . It is not possible to get  $\frac{dn(z)}{dt}$  back because we not know the individual profiles average ratios from 25 to 30 km.

lines 212 to 234: I don't understand this discussion, and I don't think it is necessary. Total aerosol optical depth is not needed, only stratospheric aerosol depth is needed between 12 and 25 km, the altitudes tabulated in **G-66**. The authors do not need two-way transmission from the ground to z, they only need stratospheric two-way transmissions from the normalization altitude (or 25 km) down to z. Since total aerosol optical depth is very variable, and usually dominated by the troposphere, any use of total optical depth data here is fraught with large uncertainties.

**Reply:** We disagree with the reviewer. It is necessary to remember that the attenuation processes of the emitted and backscattered laser signal takes place along the complete path between the emitter, the atmospheric backscatterers and the sensor. In this case the emitter and the sensor are located at the surface. Then tropospheric atmospheric components (including tropospheric aerosols) contribute to the laser signal attenuation. Assuming negligible tropospheric AOD has been a common practice introducing large uncertainties. In the case of high tropospheric AOD those uncertainties are higher than the uncertainties associated to the tropospheric AOD variability. Applying the 2-way atmospheric transmittance correction to stratospheric aerosols (SA) lidar signals from major volcanic eruptions (including the tropospheric AOD) is very important to produce realistic quantitative estimates of the SA optical properties.

Lines 290 to 340 and Fig. 1 are also not needed for the same reasons. I strongly suggest to remove all this confusing and unnecessary material.

**Reply:** We disagree with the reviewer. As we stated above, it has been a common practice in the processing of stratospheric aerosols lidar signals to discard the two way attenuation produced by tropospheric aerosols. That is one of the key points of the paper: it should be done whatever

is necessary to find tropospheric AOD (if it is available still it may be used total AOD and produce tropospheric AOD after you get the first stratospheric AOD by subtraction). That will allow to conduct the 2-way aerosols transmittance correction. The figure is necessary to support why the correction by two way aerosols transmittance should be conducted.

Sections 2.5, 2.5.1, 2.5.2, very long and wordy. should be shortened substantially. The key points should have already been said / explained in the description of the method to get from  $SR_o(694, z)$  tabulated in G-66 to  $\beta_a(z)$  and  $\alpha_a(z)$ .

In section 2.5.1: I think the authors need to explain, here or when they describe their algorithm, that the US-Standard Atmosphere density profile needs to be backed out from  $SR_o(694, z)$  tabulated in G-66 to get the original lidar return signal  $\frac{dn(z)}{dt} \frac{z^2}{K}$  in Eq. 1, and that then better / newer profiles are used to derive  $\alpha_a(z)$ .

**Reply:** We have already explained above it is not possible to retrieve the original lidar returned signal.

Also in 2.5.1 and 2.5.2, it needs to be stated that only the stratospheric parts of the two way transmissions due to Rayleigh-extinction and ozone absorption are needed, and that both of these are almost constant at  $\approx 0.98$ , and very close to 1. This means that it is essentially irrelevant, which atmospheric profiles are used to account for the two transmissions.

Section 2.5.3: Should be removed entirely, as mentioned above.

**Reply:** Regarding the above 4 comments with respect to section 2.5 and its subsections. We disagree with the reviewer on his requests to remove subsections of section 5. Instead, we have moved the necessary detailed explanations originally included in the manuscript to the Supplement 1. Section 2.5 is now a synthesized description of the complementary datasets used

Section 2.7.2: I think it would be very helpful to see a typical altitude profile of the overall error, and the different contributions. I would expect, that the contributions from Rayleigh and ozone two-way transmissions are quite small, and that other terms dominate.

**Reply:** Figures 10a and 11a provide time vs. altitude relative error cross section of the aerosol extinction corrected by two-way transmittance, together with the respective time vs. altitude cross section of the aerosol extinction corrected by two-way transmittance in the respective figures 10b and 10c. Together with the tabulated results in Table 5, there is enough information to evaluate the error levels on time and altitude in the main variable of interest that we did. The contributions from Rayleigh and ozone two-way transmittance have been already discussed in the literature, for example Russell (1979).

Section 3.1: should  $\beta_m(\lambda, 594)$  not be  $\beta_m(\lambda, 694)$  throughout this section (and in a few other places)? To me, it would be clearer in most places to say "density profile from the US Standard Atmosphere" and "density profiles from local radiosondes" instead of " $\beta_m(\lambda, 694)$  from the US Standard Atmosphere" and " $\beta_m(\lambda, 694)$  from the soundings"

**Reply:** The reviewer is right it should be  $\beta_m(\lambda, 694)$ . Corrected.

Figure 4: it would be good to have two more panels showing the difference (or the ratio) of  $\beta_{aUS}(\lambda, 694)$  and  $\beta_{aRadisondes}(\lambda, 694)$  (or  $\alpha_{aUS}(\lambda, 694)$  and  $\alpha_{aRadisondes}(\lambda, 694)$ ). Fig. 2 and 3 could even be dropped then.

**Reply:** We do not agree with the reviewer. The goal of the work reported was to recover an reprocess the lidar dataset to derive stratospheric aerosols extinction profiles. Including two more panels to show the differences between  $\beta_{aUS}(\lambda, 694)$  and  $\beta_{aRadisondes}(\lambda, 694)$  is less relevant for the purpose of the paper than showing the differences in the final result of the processing,  $\alpha_{US}(\lambda, 694)$  and  $\alpha_{Radisondes}(\lambda, 694)$ , described in the section. On top of showing the little differences between  $\alpha_{US}(\lambda, 694)$  and  $\alpha_{Radisondes}(\lambda, 694)$  on both sites, they provide information not available until the present. Figure 2 provide a more detailed cross-sections of  $\alpha_a(532, z)$  from the stratospheric aerosols after Agung than the  $SR(\lambda, 694)$  bi-monthly isopleths in figure 10 of Grams and Fiocco (1967). For Fairbanks figure 3 provide the first corresponding stratospheric aerosols cross-sections of  $\alpha_a(532, z)$  .

Figures 5, 8, 9: the indicator symbols at the top axes are not needed and confusing. They should be removed.

**Reply:** We do not agree with the reviewer. The indicator symbols in the cross-sections figures 5, 8 and 9 provide the time population of the measurements in the cross-sections, allowing to differentiate the time sections represented by measurements and the interpolated values.

Figure 9 contains the same information as Fig. 5, and is more comprehensive. Fig. 5 should be dropped. The entire discussion of results without correction for aerosol 2-way transmission should be shortened substantially. We know these results are poorer, and Fig. 9 shows it very clearly. There is not point in lengthy discussions of things that are obsolete or have been superseded.

**Reply:** We do not agree with the reviewer. Figures 5 and 9 are complementary. Figure 5 shows the variability in Lexington sAOD series and at the same time gives inside in the Lexington differences in magnitude and temporal scales respect to Fairbanks. Figure 9 put in context one of the key points we make in the paper: the lidar signal correction by two-way transmittance should not be dismissed, ignored or considered obsolete. In particular, there should be conducted the necessary effort to account for the tropospheric aerosols two-way transmittance correction.

After Figs. 6 and 7: It might be good to have a Figure similar to what I suggest above for Fig. 4, but showing the differences between profiles with and without correction for aerosol 2-way transmission.

**Reply:** We do not agree with the reviewer. As we stated in our reply to the comment on figure 4, the goal of the work reported was to recover and reprocess the lidar dataset to derive stratospheric aerosols extinction profiles. It is much less relevant to depict the differences in the profiles uncorrected and corrected by 2-way transmittance than depicting the cross-sections. That is more relevant yet in this case, where notable differences appears between them.

Figure 8: these results should be included in Fig. 9, and Fig. 8 dropped.

**Reply:** We do not agree with the reviewer. The set of measurements available for Lexington and Fairbanks have different extensions and in consequence represent different temporal scales of the sAOD variability. Including figure 8 in figure 9 will eliminate the short term AOD variability for Fairbanks, as happened in Figure 5.

Lines 581 to 586: This is a very complicated way of saying that the errors in the aerosol parameters blow up, when there is little aerosol, and SR is close to 1.

Lines 587 to 592: A very complicated way of saying that uncertainty due to aerosol extinction correction becomes large, when aerosol extinction becomes large.

**Reply:** We do not agree with the reviewer regarding the above 2 comments. We are discussing the error magnitudes in this particular case for both lidar series and pointing to the factors responsible of the high error levels.

Lines 597 to 618: Difficult to read, and difficult to find take-home messages.

**Reply:** The text in lines 597 to 618 was modified to make easy to read. It is now:

*“The time vs. altitude contours of the  $\left(\frac{\delta\alpha_a^{T_a}}{\alpha_a^{T_a}}\right)$  relative errors and of the  $\alpha_a^{T_a}(z, n)$  are shown in figures 9 and 10 for Lexington and Fairbanks respectively. The regions with maximum magnitudes of  $\alpha_a^{T_a}$  at both sites are associated with the lower relative errors as expected. At Lexington, for  $\alpha_a^{T_a} > 8 \times 10^{-3} \text{ km}^{-1}$  the relative errors are  $\leq 30\%$ . It is also evident that relative errors equal or lower than 50% dominate both in time and altitude. In the case of Fairbanks, for  $\alpha_a^{T_a} > 2 \times 10^{-3} \text{ km}^{-1}$  the relative errors are  $\leq 40\%$ . The relative errors of  $\alpha_a^{T_a}$ , in table 4, produce  $\tau_a^{T_a}$  relative errors above 100%. Those estimated values of the relative errors for  $\tau_a^{T_a}$  together with the ones in table 4 are substantially larger than other sets of volcanically perturbed stratospheric aerosols lidar measurements.*

*The high error magnitudes in the  $\left(\frac{\delta\beta_a}{\beta_a}\right)$  at 694 nm estimation could be reduced in case the  $SR_0$  values increase. In several of the 75  $SR_0$  profiles a renormalization processing could*

increase  $SR_0$  magnitude. This is reasonable since the normalization altitude range (no aerosol present) was 25 to 30 km, where there certainly would be some aerosol present. Inspection of the plots of  $SR_0$  vs altitude in figures 14, 15 and 16 in G-66 shows the presence of aerosols between 25 and 30 km. And in some of the profiles  $SR_0$  is above 1 at all levels (1.0 indicates no aerosol). In addition, the introduction of the two-way transmittance correction in the processing of  $SR_0$ , will increase  $SR_0$  from the raw returned lidar signal.

Options are available to find the raw lidar data to conduct the reprocessing described above. These include searching for the filmed images of the oscilloscopes used as registers and/or the original punched cards (probably transferred to tapes) both reported in G-66. A last resort would be the digitalization of the  $SR_0$  from the figures cited above. The original signal profiles could then be reconstructed inverting the normalization procedure applied to produce the  $SR_0$  profiles.”

Section 3.4: Given the overall length of this data paper, and to maintain a better focus, I would suggest to drop this entire section, including Figs. 12 and 13. This is supposed to be an ESSD data paper, not an ACP paper.

**Reply:** As we explained at the start of this reply to the reviewer’s comments, we strongly disagree with this comment from the reviewer. We designed this paper to include this important initial comparison to assess the magnitude of the stratospheric AOD (sAOD), including with the substantial increase when the two-way transmittance effect is resolved. We feel strongly the context from comparing to the Agung sAOD within the CMIP6 volcanic forcing dataset used in CMIP6 historical integrations, and to the ISA-MIP Agung interactive stratospheric aerosol simulations from Dhomse et al. (2020) is an important and valuable element of the manuscript.

The reviewer seems to be suggesting that ESSD papers should only focus on observational datasets, with a narrow focus only to present the dataset recovered, without comparing to other similar or complimentary datasets (whether they be observation-based or model-based data).

We strongly disagree with that suggestion, and feel the brief model-observation comparison in section 3.4 is entirely consistent with the inter-disciplinary and international remit for the ESSD journal. Whilst we agree that fully interpreting the data is out of scope for ESSD, it would seem perverse to exclude relevance of the dataset for the international ISA-MIP and CMIP6 activities.



### Other corrections:

1. The Equation on line 444 was incorrectly numbered (18) while there was jump on the numbering jump equation (17) to (19). The numbers were reassigned after the number (17) in the order they were listed in the manuscript. A new re-assignment of equations numbers was made from equation 14 on, after the transfer of section 2.5 to the Supplement 1 eliminated equations (12) and (13) from the manuscript.
2. The decision to move the subsections in section 2.5 to Supplement 1 included eliminating figure 1 and table 2 from the manuscript. Consequently all the figures and tables were re-numbered. Also several references not cited in the new version of the manuscript were erased.
3. The term “cross section” was replaced by “contours” in the manuscript.
4. Several sentences have been rewritten:

### Lines 134-135: The sentences

*“The lidar signal returns at both sites were registered photographically from oscilloscopes covering up to 40 km and then digitized. Then the digitized lidar return signals from a set of daily laser shots were averaged in 1 km bins (G-66; GF-67).”*

Were replaced by:

*“A single laser shot was registered by photographing the contribution of daylight return signal on an oscilloscope covering up to the 40 km, and then digitized by hand. The digitized return signals registered by the photomultipliers from a set of laser shots were then averaged in 1 km bins (G-66; GF-67).”*

### Line 231-233: The sentence:

*“There have been abundant accounts about the changes of the physical-chemical properties of aerosols in the eastern US from the sixties until the present (Went, 1960; Husar et al., 1991).”*

Was replaced by:

*“Changes of the aerosols physical and chemical properties from the sixties until the present in the eastern US has been documented (Went, 1960; Husar et al., 1991).”*

### Line 380-381: The sentence:

*“It is a plausible assumption because the profile  $\beta_m$  used the US 1962 Standard Atmosphere for the vertical resolution of the lidar.”*

I rewrote it:

*“The use at the lidar levels of interpolated  $\beta_m$  values from the lower resolution ones calculated using the US 1962 Standard Atmosphere, support the former assumption.”*

### Lines 421-424: The sentences

*“On top of the figures we plotted the dates the measurements were conducted (red starts at 24.5 km level). In the case of Lexington the two data gaps higher than 1 month, March and July to September both in 1964 have been left blank in the cross-sections plots. The temporal/vertical cross -section of the aerosols extinctions were generated using a linear time interpolation.”*

Were replaced by:

*“The two data gaps longer than 1 month, March, and July to September both in 1964, have been left blank. The temporal/vertical contours of the aerosol extinctions were generated using a linear time interpolation.”*

**Lines 435-441:** The sentences

*“Regarding the magnitudes of  $\alpha_a(532, z)_{US}$  in figure 1, they are slightly higher than the ones from  $\alpha_a(532, z)_{US}$ . That is also the case in figure 3 showing the cross-sections for Fairbanks, with panels similar to figure 2. This is quantified in table 3. At both sites the mean and maximum values for  $\Delta\tau_{a*}$  and  $\Delta\alpha_{a*}$  are positive showing that the magnitudes of  $\alpha_{aUS}$  and  $\tau_{aUS}$  are in general higher than  $\alpha_{a*}$  and  $\tau_{a*}$ . Also in the table we appreciate that the magnitudes of the mean percent difference increase of both variables is around 1%. The fact described above disagrees with the possibility G-66 mentions about lower aerosol backscatter from the retrieval they conducted, using the 1962 US Standard Atmosphere, and the more realistic ones using soundings.”*

Were replaced by:

*“The magnitudes of  $\alpha_a(532, z)_{US}$  in are slightly higher than the ones from  $\alpha_a(532, z)_*$  for both sites, and it is also true for  $\tau_{aUS}$  and  $\tau_{a*}$ . This is quantified in table 2. The magnitudes of the mean percent difference increase of both variables is around 1%. This difference disagrees with G-66 where he found retrievals using the 1962 US Standard Atmosphere slightly lower than the more realistic ones using soundings, but the differences are within calculated errors.”*

**Lines 451-453:** The sentences

*“The values in the denominators  $M_{dUS}$  and  $M_d$  are the mean values of  $N_{dUS}(z)$  and  $N_d(z)$  between 25 and 30 km respectively, replicating the procedure used by G-66. In figure 4 the differences  $\Delta N_d(z)$  for all the 66 soundings at Nantucket used to calculate  $N_d(z)$  and the 9 for Fairbanks are plotted. For Lexington, on panel a),  $N_{dUS}(z)$  values are both negative and positive, but higher values of  $N_{dUS}(z)$  dominate.”*

Were replaced by:

*“ $M_{dUS}$  and  $M_d$  are the mean values of  $N_{dUS}(z)$  and  $N_d(z)$  between 25 and 30 km, replicating the procedure used by G-66. In figure 3 the differences  $\Delta N_d(z)$  for 66 soundings at Nantucket and the 9 for Fairbanks are plotted. For Lexington,  $\Delta N_d(z)$  values are both negative and positive, but higher values of  $N_{dUS}(z)$  dominate.”*

**Lines 463-469:** The sentences

*“Also figure 5 shows the monthly mean  $\tau_a$  for the northern hemisphere (Sato et al., 1993). The means for the entire period of measurements available at each site are 0.0215 and 0.0099 respectively. The magnitude of the mean  $\tau_{a*}$  at Fairbanks are half that of Lexington, providing evidence of the decreasing aerosol amount with increasing latitude. At the same time, some of the daily  $\tau_{a*}$  values at Lexington are around the magnitude of the mean  $\tau_{a*}$  at Fairbanks, because of the variability of  $\alpha_a(532, z)_*$ . Few  $\tau_{a*}$  values from Lexington have magnitudes near the values of Sato  $\tau_a$ , the current reference for this period. However, as we will see in the next section a better agreement is found when the measurements are corrected by two way transmittance attenuation.”*

Were replaced by:

*“The means for the entire period of measurements available at each site are 0.0215 and 0.0099 respectively. Also shown is a monthly mean  $\tau_a$  for the northern hemisphere (Sato et al., 1993). The mean  $\tau_{a*}$  at Fairbanks is half that of Lexington, providing evidence of the decreasing aerosol amount with increasing latitude. Because of the variability of  $\alpha_a(532, z)_*$ ,  $\tau_{a*}$  values from Lexington vary widely from the Fairbanks mean to the Sato magnitude, the current reference for this period. However, as we will see in the next section better agreement is found when the measurements are corrected with two-way transmittance attenuation.”*

**Line 456 (Former Figure 2 caption, currently Figure 1):** The sentences

*“The red stars indicate the dates the measurements were conducted. The measurement gaps longer than 1 month, March, and July to September both in 1964, have been left blank.”*

Were added at the end of the Figure 1 caption.

**Lines 522-528:** The sentences

*During the course of more than two decades after the pioneering stratospheric aerosols measurements with lidar work by Fiocco and Grams (1964) multiple researchers contributed to the development of the processing algorithms to retrieve aerosols optical properties and its errors (Russell et al, 1979, Klett, 1981; Klett, 1985, Kovalev, 2015). Those facts explain the limitations that do not allow the retrieval of the full set of optical variables characterizing the stratospheric aerosols from the Fiocco and Grams dataset. However using a Junge size-distribution model, and assuming Mie scattering with refractive index 1.5, they produced estimates of the aerosol content of the stratosphere at 16 km: number concentration, surface area and the aerosol density per unit volume of air.*

Were replaced by:

*“Since the pioneering lidar work by Fiocco and Grams (1964) multiple researchers have contributed to the development of the processing algorithms to retrieve aerosol optical properties and errors (Russell et al, 1979, Klett, 1981; Klett, 1985, Kovalev, 2015). These works explain the limitations on retrieving the full set of optical variables characterizing the stratospheric aerosols from the Fiocco and Grams dataset. However assuming a Junge size-distribution model and Mie scattering with refractive index 1.5, Fiocco and Grams did produce estimates of the aerosol content of the stratosphere at 16 km: number concentration, surface area, and the aerosol density per unit volume of air.”*

**Lines 539-543:** The sentence

*“An additional validation of those results, in particular for  $\tau_a^{T_a}(532, z)$  at Lexington appears in figure 9, where the stratospheric  $\tau_a(532, z)$  for the northern hemisphere from January 1964 to July 1965 has been plotted (Sato et al., 1993). The magnitude of  $\tau_a^{T_a}(532, z)$  is the same at Lexington (and also at Fairbanks, figure 8) as the  $\tau_a(532, z)$  from Sato et al., (1993).”*

Was erased.

**Line 703-704:** The sentence

*“The search for original records should include looking for the at least 25 missing profiles from the total of at least 100 Fiocco mentions”.*

Was replaced by:

*“Future search for original records should take into account also the 25 missing files from the more of 100 referred by Fiocco.”*

6. Multiple words were replaced to improve and make easy to understand the manuscript. They could be seen in the manuscript with the changes not accepted.

**References**

Eyring, V., Bony, S., Meehl, G. A., Senior, C. A., Stevens, B., Stouffer, R. J., and Taylor, K. E.: Overview of the Coupled Model Intercomparison Project Phase 6 (CMIP6) experimental design and organization, *Geosci. Model Dev.*, **9**, 1937-1958, <https://doi.org/10.5194/gmd-9-1937-2016>, 2016.

Timmreck, C., Mann G. W., Aquila V., Hommel R., Lee L. A., Schmidt A., Brühl C., Carn S., Chin M., Dhomse S. D., Diehl T., English J. M., Mills M. J., Neely III R. R., Sheng J., Toohey M. & Weisenstein D.: The Interactive Stratospheric Aerosol Model Intercomparison Project (ISA-MIP): motivation and experimental design, *Geosci. Mod. Dev.*, **11**, 2581-2608, <https://doi.org/10.5194/gmd-11-2581-2018>, 2018.

Zanchettin, D., Khodri M, Timmreck C, Toohey M, Schmidt A, Gerber EP, Hegerl G, Robock A, Pausata FSR, Ball WT, Bauer SE, Bekki S, Dhomse SS, LeGrande AN, Mann, GW, Marshall L, Mills M, Marchand M, Niemeier U, Poulain V, Rozanov E, Rubino A, Stenke A, Tsigaridis K, Tummon F., The Model Intercomparison Project on the climatic response to volcanic forcing (VolMIP): experimental design and forcing input data for CMIP6. *Geosci. Mod. Dev.*, **9**(8), 2701-2719, <https://doi.org/10.5194/gmd-9-2701-2016>, 2016.
